# Supplementary material
Source: publisher figshare collection journal article supplement (https://aacr.figshare.com/articles/dataset/_/23183894)
Supplement: Supplementary file 1 [file 40885007]

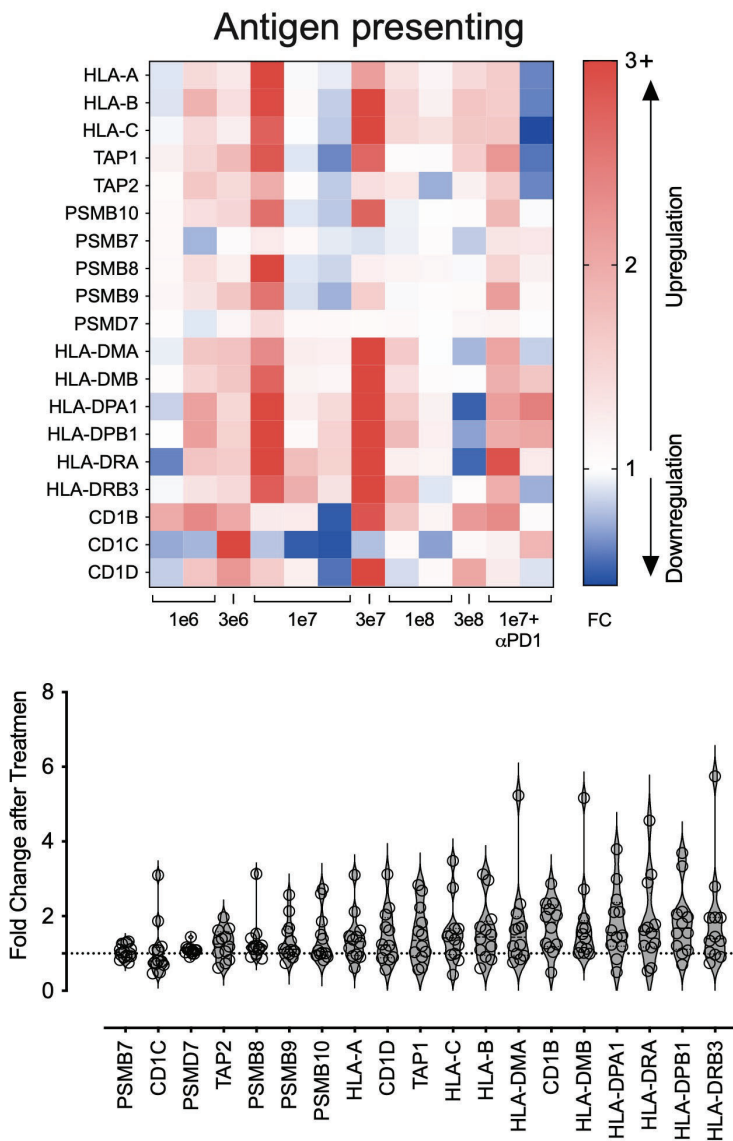

Supplemental Figure 6. Tumor biopsy gene expression changes in antigen presenting pathways after SYNB1891 treatment. Gene expression was assessed by Nanostring in core biopsy samples collected pre-dose and on day 22 seven days after the last dose of cycle 1. Heat maps show the fold change in each gene relative to baseline are shown for patients receiving different doses of SYNB1891. Combined data from all subjects are shown graphically as fold changes for each marker with each symbol representing the data from a single patient.
